# Supplementary material for: A Cinnamon-Derived Procyanidin Compound Displays Anti-HIV-1 Activity by Blocking Heparan Sulfate- and Co-Receptor- Binding Sites on gp120 and Reverses T Cell Exhaustion via Impeding Tim-3 and PD-1 Upregulation
Source: PubMed Central journal article supplement (PMC5082894; doi:10.1371/journal.pone.0165386), 2016-10-27
Supplement: pone.0165386.s001.pdf [file pone.0165386.s001.pdf]

## **SUPPLEMENTARY INFORMATIONS**

**A cinnamon-derived procyanidin compound displays anti-HIV-1 activity by blocking heparan sulfate- and co-receptor- binding sites on gp120 and reverses T cell exhaustion via impeding Tim-3 and PD-1 upregulation**

Bridgette Janine Connell<sup>1</sup>, Sui-Yuan Chang<sup>2</sup>, Ekambaranellore Prakash<sup>3\*</sup>, Rahima Yousfi<sup>4</sup>, Viswaraman Mohan<sup>3</sup>, Wilfried Posch<sup>5</sup>, Doris Wilflingseder<sup>5</sup>, Christiane Moog<sup>6</sup>, Eiichi N. Kodama<sup>7</sup>, Pascal Clayette<sup>4</sup> and Hugues Lortat-Jacob<sup>1\*</sup>

**Figure A**

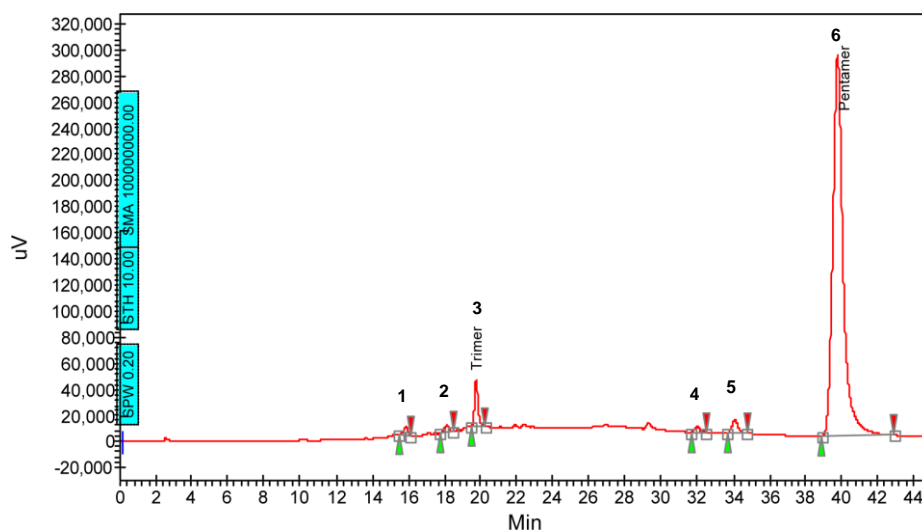

**Figure A: HPLC analysis of IND02.** The IND02, isolated from cinnamon extract, was analysed by HPLC, and followed by UV detection at 280 nm, demonstrating the presence of procyanidin trimer (~ 4 % of the eluted material) and pentamer polyphenols (~ 92 % of the eluted material). Black triangles indicate the beginnings and ends of each peak (see Table A). Unknown material (peak 1, 2, 4 and 5) represents 4.1 % of the total UV trace.

**Table A**

| Peak N°      | Identity | Start (min) | Time (min) | End (min) | Height (uV) | Area (uV.Min) | Area (%) |
|--------------|----------|-------------|------------|-----------|-------------|---------------|----------|
| 1            | unknown  | 15.48       | 15.86      | 16.11     | 6623.4      | 1643.5        | 0.784    |
| 2            | unknown  | 17.74       | 18.13      | 18.49     | 5099.6      | 1525.8        | 0.728    |
| 3            | Trimer   | 19.43       | 19.72      | 20.24     | 38086.6     | 8250.9        | 3.937    |
| 4            | unknown  | 31.65       | 31.98      | 32.53     | 4307.3      | 1415.4        | 0.675    |
| 5            | unknown  | 33.66       | 34.07      | 34.78     | 10499.4     | 4075.1        | 1.945    |
| 6            | Pentamer | 38.92       | 39.82      | 42.93     | 293862.9    | 192653.9      | 91.931   |
| <b>Total</b> |          |             |            |           | 358479.1    | 209564.5      | 100.000  |

The table shows the chromatographic characteristics of the cinnamon-isolated IND02. Peak numbers referred to Figure A.

**Figure B**

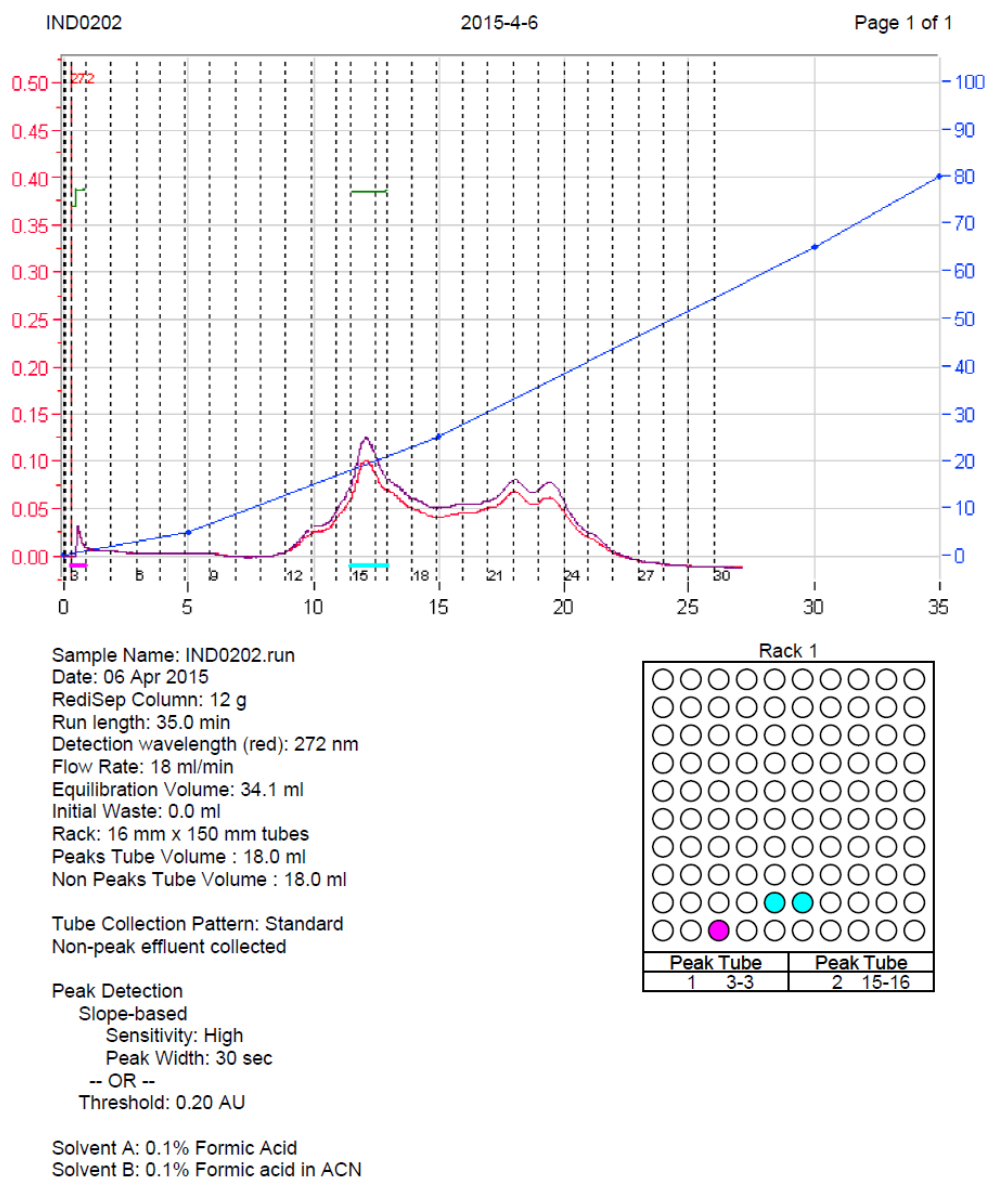

**Figure B: HPLC analysis of IND02-trimer.** The sample (blue fraction on the chromatogram) was analyzed for Optical rotation,  $\lambda_{max}$  in UV spectrum, and NMR spectroscopy on 600 MHz (Bruker Biospin Instrument). All the experiments were performed at 25° C, using 10 mg sample for  $^1\text{H}$  NMR and 50 mg sample for  $^{13}\text{C}$  NMR. The observed values were compared with literature reported values of cinnamtannin B1 (Table B below). The structure predicted using observed values matched with that of literature reported Cinnamatanin B1 [1,2] and indicated the purity of the trimer to be 99%. This was also confirmed using Quantum Mechanics and Neuronal network calculations.

**Table B**

| Ring           | No   | <sup>13</sup> C |          | <sup>1</sup> H |          |
|----------------|------|-----------------|----------|----------------|----------|
|                |      | Observed        | Reported | Observed       | Reported |
| (upper unit) C | C-2  | 100.2           | 99.95    |                |          |
|                | C-3  | 67.2            | 67.17    | 3.18           | 3.29     |
|                | C-4  | 28.86           | 28.86    | 4.06           | 4.15     |
| A              | C-5  | 154.2           | 156.74   |                |          |
|                | C-6  | 98.3            | 98.33    | 5.87           | 5.97     |
|                | C-7  | 157.9           | 157.8    |                |          |
|                | C-8  | 96.6            | 96.6     | 5.92           | 6.02     |
|                | C-9  | 154.2           | 154.14   |                |          |
|                | C-10 | 105             | 104.9    |                |          |
| B              | C-1' | 132.5           | 132.44   |                |          |
|                | C-2' | 119.9           | 119.90   | 6.93           | 7.03     |
|                | C-3' | 145.56          | 145.5    |                |          |
|                | C-4' | 146.6           | 146.59   |                |          |
|                | C-5' | 115.8           | 116.18   | 6.75           | 6.84     |
|                | C-6' | 115.9           | 115.75   | 6.76           | 6.86     |
| Middle unit F  | C-2  | 78.9            | 78.86    | 5.60           | 5.70     |
|                | C-3  | 72.6            | 72.55    | 4.02           | 4.13     |
|                | C-4  | 38.3            | 38.27    | 4.45           | 4.56     |
| D              | C-5  | 155.8           | 155.76   |                |          |
|                | C-6  | 96.1            | 96.09    | 5.70           | 5.80     |
|                | C-7  | 151.1           | 151.08   |                |          |
|                | C-8  | 106.8           | 106.42   |                |          |
|                | C-9  | 151.8           | 151.78   |                |          |
|                | C-10 | 106.8           | 106.73   |                |          |
| E              | C-1' | 131.8           | 131.76   |                |          |
|                | C-2' | 116.8           | 116.72   | 7.21           | 7.32     |
|                | C-3' | 145.9           | 145.89   |                |          |
|                | C-4' | 146.3           | 146.27   |                |          |
|                | C-5' | 116.2           | 115.79   | 6.73           | 6.82     |
|                | C-6' | 121.4           | 121.36   | 7.10           | 7.19     |
| Lower unit     | C-2  | 80.4            | 80.27    | 4.28           | 4.38     |
| I              | C-3  | 67.6            | 65.71    | 3.76           | 3.85     |
|                | C-4  | 29.9            | 29.84    | 2.74           | 2.83     |
| G              | C-5  | 155.6           | 155.99   |                |          |
|                | C-6  | 96.5            | 96.51    | 6.01           | 6.10     |
|                | C-7  | 155.6           | 155.53   |                |          |
|                | C-8  | 108.9           | 108.85   |                |          |
|                | C-9  | 156.1           | 155.78   |                |          |
|                | C-10 | 100.1           | 100.08   |                |          |
| H              | C-1' | 132.2           | 133.17   |                |          |
|                | C-2' | 115.5           | 115.48   | 6.72           | 6.82     |
|                | C-3' | 145.4           | 145.31   |                |          |
|                | C-4' | 145.8           | 145.74   |                |          |
|                | C-5' | 116             | 116.03   | 6.64           | 6.76     |
|                | C-6' | 119.5           | 119.45   | 6.63           | 6.72     |

The table shows the comparison of the NMR output (600 MHz) for <sup>13</sup>C and <sup>1</sup>H in the observed experiment versus the reported literature, confirming the identity of the compound to be Cinnamatinin B1.

**Note:**

1. While prediction methodology relied on standard solvent chemical shift to predict the chemical shifts, the observed chemical shifts were referenced to TMS [(CH<sub>3</sub>)<sub>4</sub>Si], the standard deviation between the predicted and the observed chemical shifts is 0.095 ppm.
2. IND02-trimer has fourteen -OH groups and all of them appear at 4.52 ppm as a broad peak. They are not listed in the above table.

**Supplementary reference**

1. Ben Amor N, Bouaziz A, Romera-Castillo C, Salido S, Linares-Palomino PJ, et al. (2007) Characterization of the intracellular mechanisms involved in the antiaggregant properties of cinnamtannin B-1 from bay wood in human platelets. *J Med Chem* 50: 3937-3944.
2. Kamiya K, Watanabe C, Endang H, Umar M, Satake T (2001) Studies on the constituents of bark of *Parameria laevigata* Moldenke. *Chem Pharm Bull (Tokyo)* 49: 551-557.
